# Supplementary material for: A collaborative data storage with incentive mechanism for blockchain-based IoV
Source: PeerJ Comput Sci. 2025 May 27;11:e2849. doi: 10.7717/peerj-cs.2849 (PMC12192716; doi:10.7717/peerj-cs.2849)
Supplement: Supplemental Information 2 [file peerj-cs-11-2849-s002.xlsx]

## Sheet: Fig.7
Block Number	this scheme	layerChain	GpDB	traditional blockchain	IoVBlockSecure model
20	665	1550	875	6000	224
40	975	3265	1715	12000	448
60	755	4405	2470	18000	672
80	815	5980	3500	24000	896
100	555	7615	4320	30000	1120
120	545	9005	5170	36000	1344
140	645	10550	6005	42000	1568
160	955	12400	6925	48000	1792
180	725	13500	7675	54000	2016
200	675	15200	8840	60000	2240

## Sheet: Fig.8
RSUNum	50 blocks	100 blocks	150 blocks
10	110	155	180
20	330	370	440
30	430	460	550
40	515	810	630
50	725	770	710
60	705	950	1065
70	1105	1210	1445

## Sheet: Fig.9
Block number	30-80	30-70	30-90	40-90	40-80	40-70
50	145	153	138	298	309	333
75	240	225	205	421	435	450
100	306	288	296	602	639	621
125	379	386	356	766	777	788
150	442	452	430	946	922	931
175	526	541	515	1055	1076	1084

## Sheet: Fig.10
RSU Number	50 blocks	100 blocks	150 blocks
10	36	81	125
20	83	190	275
30	112	281	410
40	133	318	474
50	176	371	604
60	213	459	635
70	236	514	758

## Sheet: Fig.11
block size	50 blocks	100 blocks	150 blocks
10	5	49	66
20	46	94	177
30	86	172	275
40	128	269	424
50	166	339	519
60	184	408	612

## Sheet: Fig.12
RSU id	receive storage	uninstall storage	proportion
2	135	105	1.28571
4	100	90	1.11111
6	160	130	1.23077
8	100	90	1.11111
10	145	120	1.20833
12	115	85	1.35294
14	110	100	1.1
16	155	155	1
18	105	70	1.5
20	125	95	1.31579
22	125	120	1.04167
24	145	120	1.20833
26	90	70	1.28571
28	130	105	1.2381
30	115	80	1.4375
32	120	120	1
34	120	110	1.09091
36	125	95	1.31579
38	135	115	1.17391
40	120	90	1.33333

## Sheet: Fig.13
Block number	this scheme	traditional blockchain
5	1850350	3700700
10	3996756	7401400
15	6106155	11102100
20	8437596	14802800
25	10435974	18503500
30	12767415	22204200
35	14765793	25904900
40	17060227	29605600
45	19169626	33306300
50	21501067	37007000

## Sheet: Fig.14
RSU id	30 blocks	90 blocks	150 blocks
1	149.813	152.873	154.881
2	147.201	149.476	154.697
3	150.772	150.49	150.263
4	151.307	152.205	154.118
5	149.178	152.246	155.186
6	151.75	146.923	153.78
7	150.737	150.895	148.843
8	148.604	150.978	150.558
9	147.039	146.441	146.84
10	151.943	155.84	149.728
11	150.785	149.7	145.432
12	153.374	149.212	150.94
13	150.852	151.29	143.382
14	149.791	134.571	137.982
15	146.714	151.48	150.712
